# Supplementary material for: Carbon-supported perovskite-like CsCuCl3 nanoparticles: a highly active and cost-effective heterogeneous catalyst for the hydrochlorination of acetylene to vinyl chloride
Source: Royal Society of Chemistry journal article supplement (doi:10.1039/c8cy00291f), 2018-01-01
Supplement: c8cy00291f1.pdf [file c8cy00291f1.pdf]

**Carbon supported perovskite-like CsCuCl<sub>3</sub> nanoparticles: A highly active and cost-effective heterogeneous catalyst in the hydrochlorination of acetylene to vinyl chloride**

Yuanyuan Zhai,<sup>a</sup> Jia Zhao,<sup>a,\*</sup> Xiaoxia Di,<sup>a</sup> Shuxia Di,<sup>a</sup> Bolin Wang,<sup>a</sup> Yuxue Yue,<sup>a</sup>  
Gangfeng Sheng,<sup>a</sup> Huixia Lai,<sup>a</sup> Lingling Guo,<sup>a</sup> Hong Wang,<sup>a</sup> Xiaonian Li<sup>a,\*</sup>

<sup>a</sup>Industrial Catalysis Institute, Laboratory Breeding Base of Green Chemistry-Synthesis Technology, Zhejiang University of Technology, Hangzhou 310014, China.

Tel. /fax: +86 57188320002.

E-mail addresses: [jiazhao@zjut.edu.cn](mailto:jiazhao@zjut.edu.cn) (J. Zhao), [xnli@zjut.edu.cn](mailto:xnli@zjut.edu.cn) (X. Li).

**Supporting information**

### Syntheses of unsupported $\text{CsCuCl}_3$

Cesium cupric chloride ( $\text{CsCuCl}_3$ ) was synthesized in an aqueous solution. The Cs precursor,  $\text{CsCl}$ , was weighted and dissolved in the deionized water, then the equal molar  $\text{CuCl}_2 \cdot 2\text{H}_2\text{O}$  was added into  $\text{CsCl}$  solution. After full stirring and dissolving, set the solution quietly at room temperature.  $\text{CsCuCl}_3$  crystals readily grew from the solution. After adequate 12h growth, dark yellow  $\text{CsCuCl}_3$  crystals can be obtained.

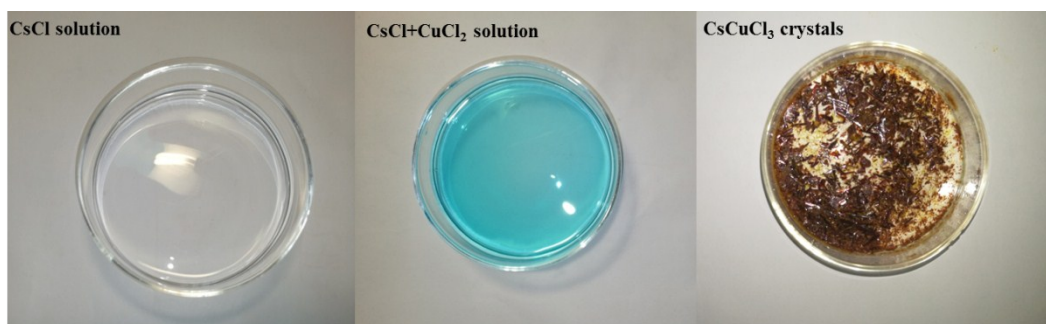

**Fig.S1** The preparation procedure of  $\text{CsCuCl}_3$  crystals

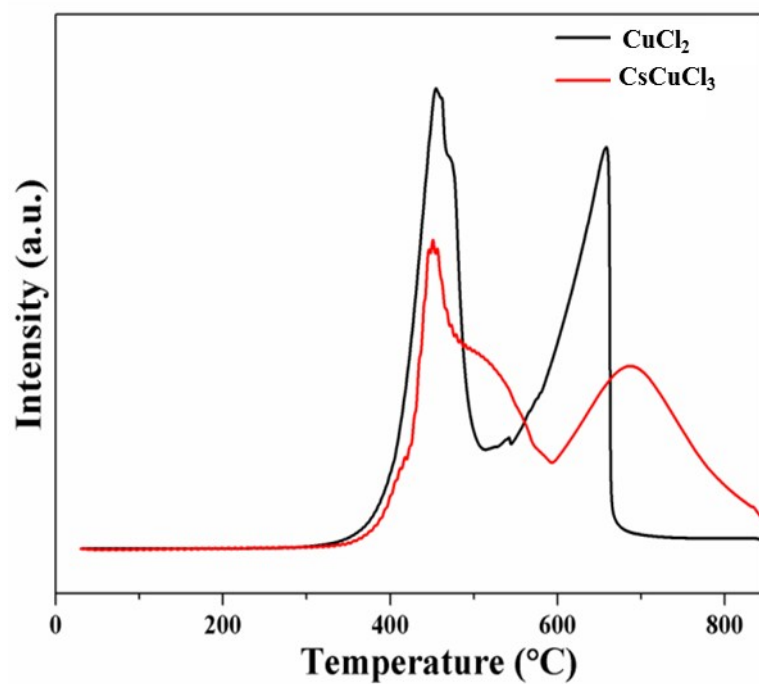

**Figure.S2** H<sub>2</sub>-TPR analysis of unsupported CuCl<sub>2</sub> and CuCsCl<sub>3</sub> crystals
